# Supplementary material for: Covalent Organic Frameworks for Simultaneous CO2 Capture and Selective Catalytic Transformation
Source: MDPI journal article supplement (doi:10.3390/catal11091133), 2021-09-21
Supplement: s1 [file s1]

# Supporting Information

## Covalent Organic Frameworks for Simultaneous CO<sub>2</sub> Capture and Selective Catalytic Transformation

Yaling Li,<sup>†</sup> Jianqiang Zhang,<sup>†</sup> Kaiming Zuo,<sup>†</sup> Zhongping Li,<sup>‡</sup> Yu Wang,<sup>§</sup> Hui Hu,<sup>†</sup>  
Chaoyuan Zeng,<sup>\*,†</sup> Huanjun Xu,<sup>†</sup> Baoshan Wang,<sup>\*,#</sup> and Yanan Gao<sup>\*,†</sup>

<sup>†</sup> Key Laboratory of Ministry of Education for Advanced Materials in Tropical Island Resources, Hainan University, No 58, Renmin Avenue, Haikou 570228, P. R. China;

<sup>‡</sup> Department of Chemistry, Faculty of Science, National University of Singapore, 3 Science Drive 3, 117543, Singapore;

<sup>§</sup> School of Light Industry and Chemical Engineering, Dalian Polytechnic University, 1 Qinggongyuan, Dalian 116034, P. R. China;

<sup>#</sup> Key Laboratory of Biomedical Polymers (Ministry of Education), College of Chemistry and Molecular Sciences, Wuhan University, Wuhan 430072, P. R. China.

**Table S1.** Elemental analysis of Co(II)@TA-TF COF.

| Sample           | Molecular formula                                                | Elemental analysis (Calcd.) |         |         | Elemental analysis (Found) |         |         |
|------------------|------------------------------------------------------------------|-----------------------------|---------|---------|----------------------------|---------|---------|
|                  |                                                                  | N [wt%]                     | C [wt%] | H [wt%] | N [wt%]                    | C [wt%] | H [wt%] |
| Co(II)@TA-TF COF | (C <sub>88</sub> H <sub>54</sub> N <sub>8</sub> Co) <sub>n</sub> | 8.74%                       | 82.42%  | 4.24%   | 8.14%                      | 80.90%  | 4.01%   |

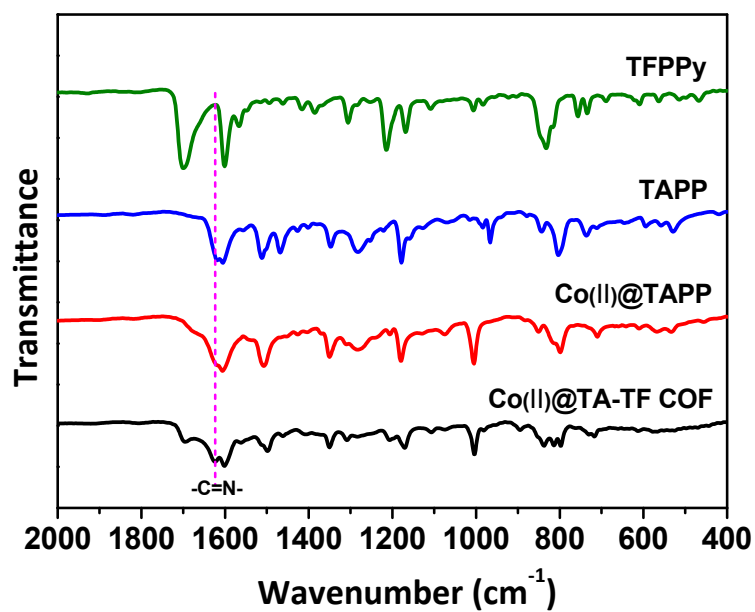

**Figure S1.** FTIR spectra of Co(II)@TA-TF COF, Co(II)@TAPP, TAPP and TFPPy.

Firstly, the TA-TA + TF-TF AA stacking model (space group: Pmmm) was constructed and optimized. Apparently, the shoulder peak at 5.4 is absent (Figure S2).

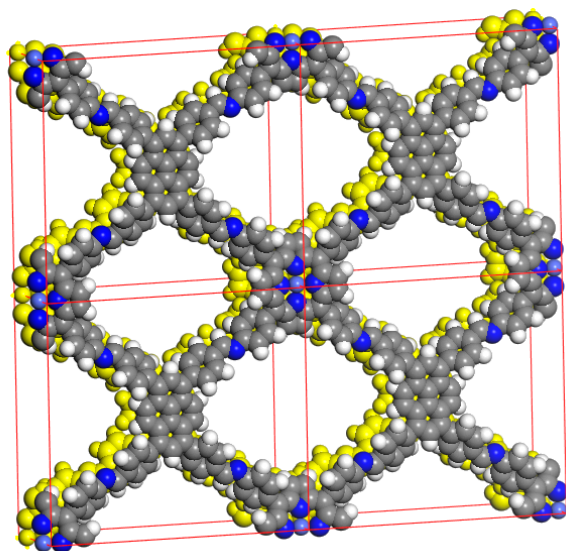

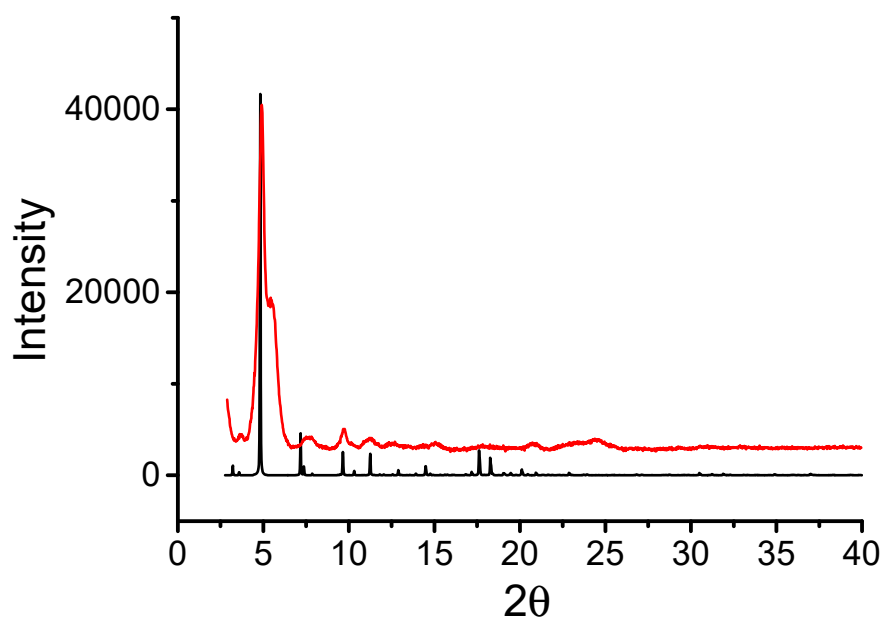

**Figure S2.** Comparison of experimentally observed PXRD pattern and calculated profile based on the true TA-TA + TF-TF AA eclipsed packing structure.

The staggered AB-stacking structure (space group: *Pmma*) is more stable than the true AA stacking structure by 17 kcal/mol, however, the XRD plot does not match the experimental one yet (Figure S3).

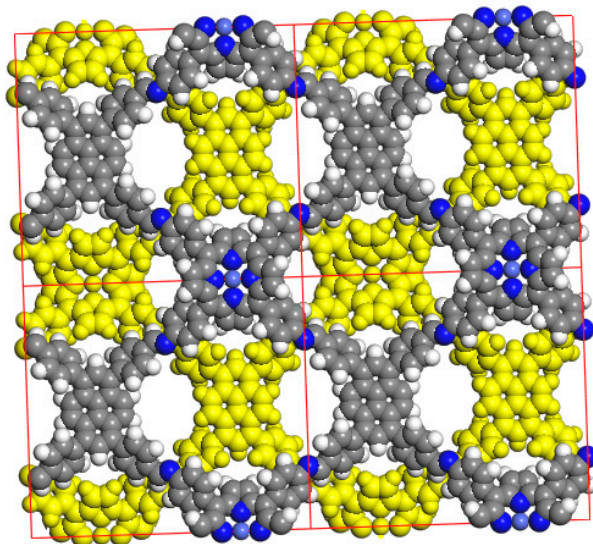

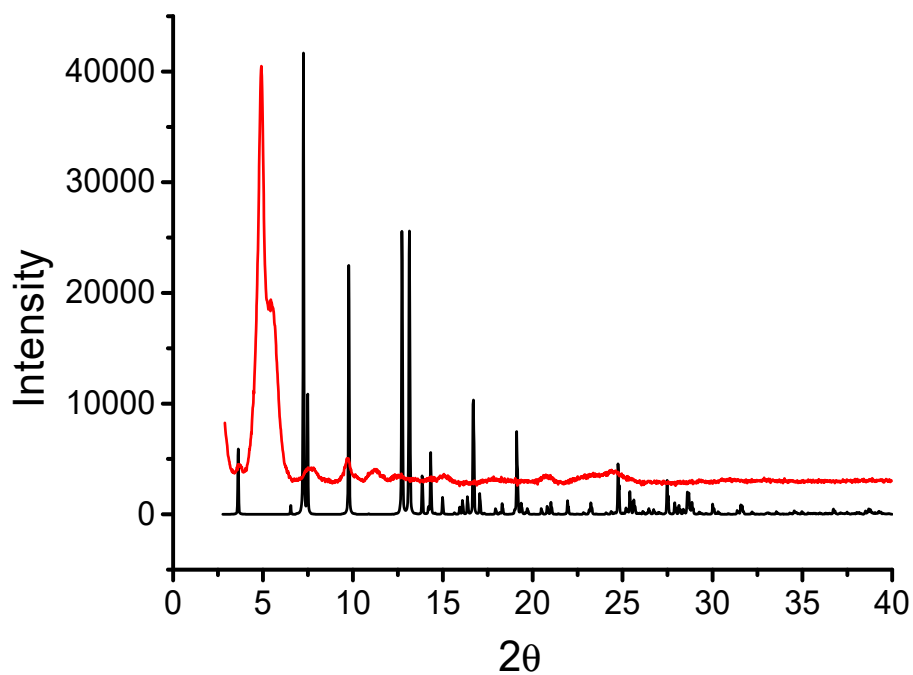

**Figure S3.** Comparison of experimentally observed PXRD pattern and calculated profile based on the one staggered AB-stacking structure.

An alternative staggered AB-stacking structure (space group: *Pm**ma*), as shown in Figure S4, was also constructed and optimized. However, the energy of this structure is 5 kcal/mol higher than that of the structure listed in Figure S3. Moreover, the PXRD plot does not match the experimental one yet.

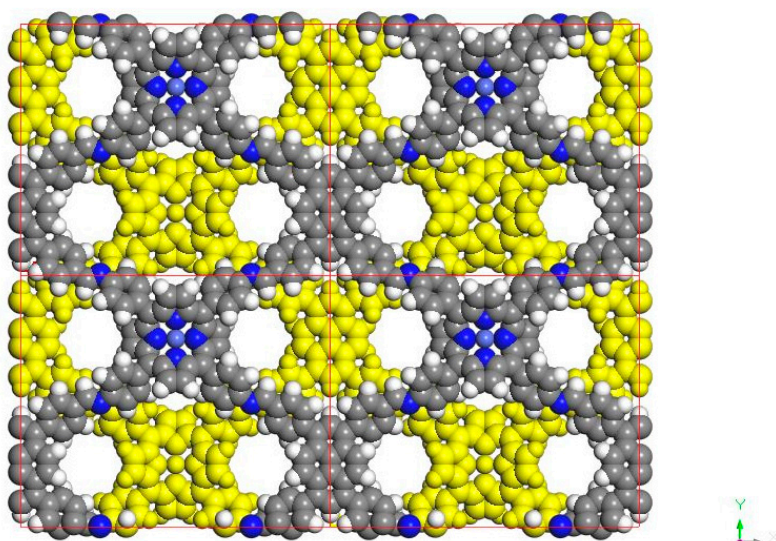

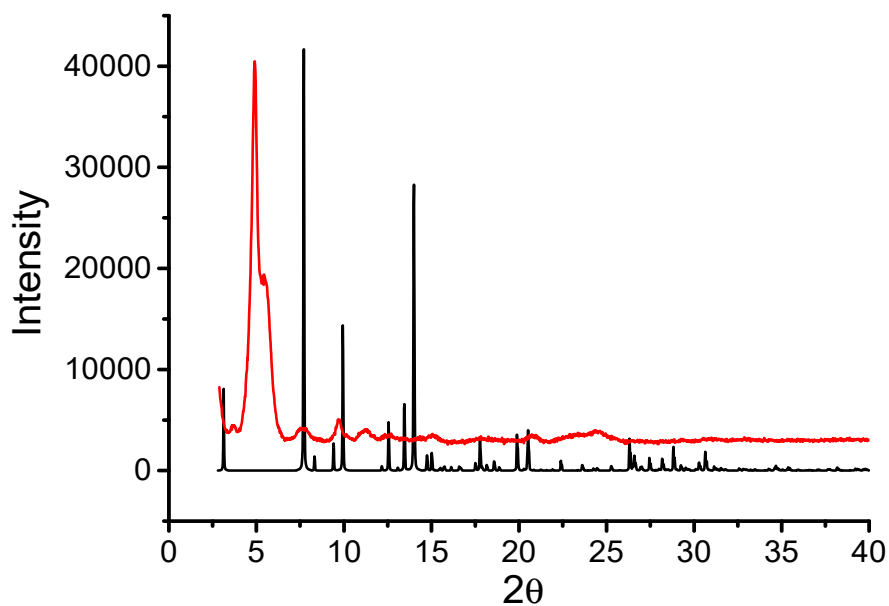

**Figure S4.** Comparison of experimentally observed PXRD pattern and calculated profile based on the alternative staggered AB-stacking structure.

Then, the TA-TF AA stacking model (space group: Pmmn) was constructed and optimized. This structure is more stable than the TA-TA + TF-TF stacking model, as indicated by the fact that its energy is 48 kcal/mol lower (Figure S5). However, the shoulder peak is still missing.

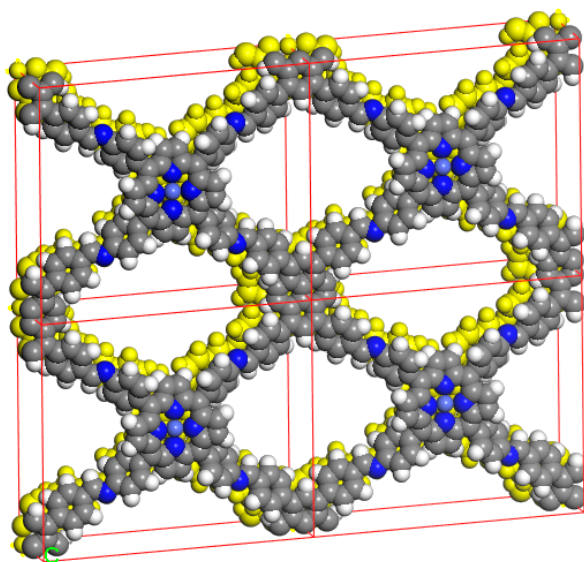

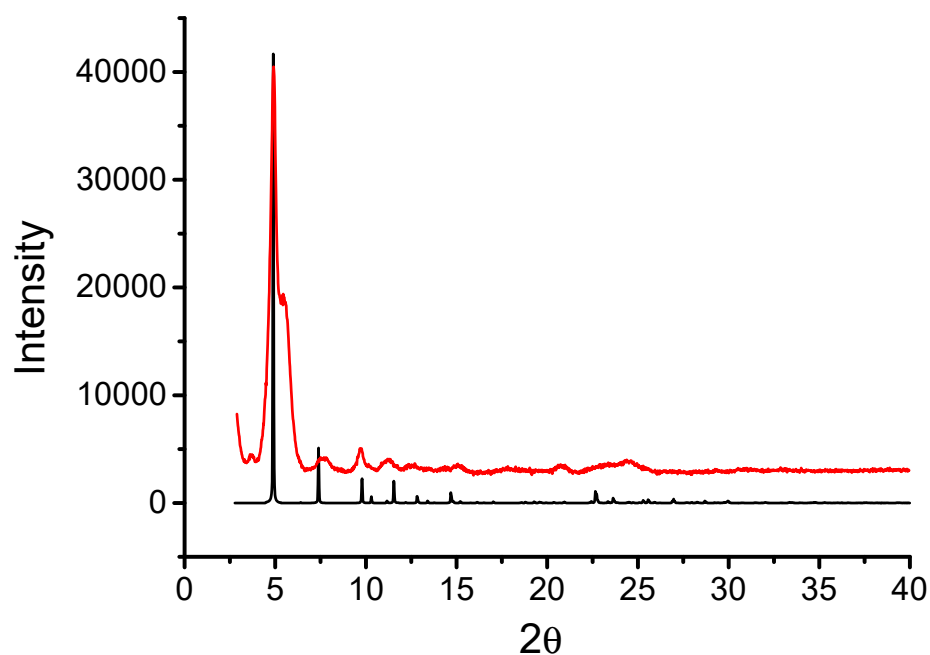

**Figure S5.** Comparison of experimentally observed PXRD pattern and calculated profile based on the true TA-TF AA stacking model.

In this case, the slipped TA-TF AA structure was considered by optimizing the slipping distance  $\Delta d$ . The minimum (space group: P-1) was located at  $\Delta d = 1.7 \text{ \AA}$  (along  $xy$  direction), the energy is lowered by 6 kcal/mol. In this case, the theoretical XRD pattern matches the experimental graph very well (Figure S6). Refinement results in  $R_{wp} = 5.75\%$ , and  $R_p = 3.51\%$ .

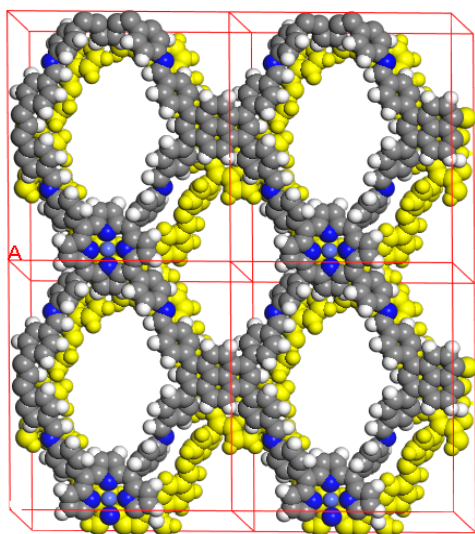

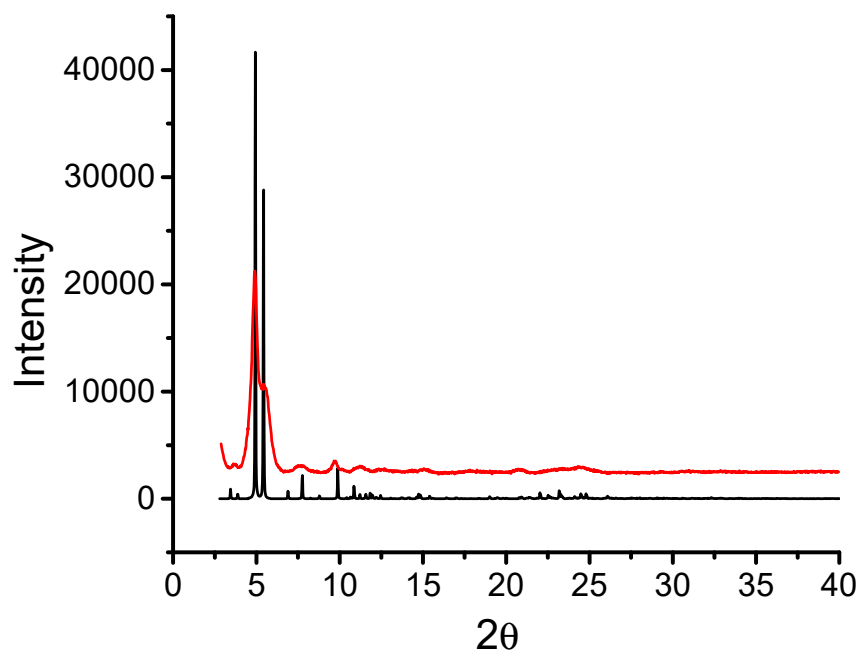

**Figure S6.** Comparison of experimentally observed PXRD pattern and calculated profile based on the slipped TA-TF AA structure with a slight interlayer horizontal offset of 1.7 Å. This structure was described in the text, as shown by Figure 1.

**Table S2.** Fractional atomic coordinates for unit cell of Co(II)@TA-TF COF calculated using the density-functional tight-binding method after performing the Pawley refinement.

| Slipped TA-TF<br>AA structure | Space group: Triclinic P-1<br>$a = 8.5899 \text{ Å}$ , $b = 23.0876 \text{ Å}$ , $c = 25.8289 \text{ Å}$<br>$\alpha = 83.7391^\circ$ , $\beta = 95.0091^\circ$ , $\gamma = 97.6533^\circ$ |          |          |
|-------------------------------|-------------------------------------------------------------------------------------------------------------------------------------------------------------------------------------------|----------|----------|
|                               |                                                                                                                                                                                           |          |          |
| C                             | -1.07899                                                                                                                                                                                  | -0.55505 | -0.31829 |
| H                             | -1.13532                                                                                                                                                                                  | -0.53139 | -0.29181 |
| C                             | -0.99213                                                                                                                                                                                  | -0.52199 | -0.35664 |
| H                             | -0.98087                                                                                                                                                                                  | -0.47371 | -0.35899 |
| C                             | -1.06010                                                                                                                                                                                  | -1.13055 | -0.88848 |
| H                             | -1.16434                                                                                                                                                                                  | -1.16182 | -0.89797 |
| C                             | -0.99337                                                                                                                                                                                  | -1.09342 | -0.92898 |
| H                             | -1.04834                                                                                                                                                                                  | -1.09578 | -0.96892 |
| C                             | -0.24875                                                                                                                                                                                  | -0.63848 | -1.08671 |
| H                             | -0.24084                                                                                                                                                                                  | -0.68592 | -1.07941 |
| C                             | -0.23116                                                                                                                                                                                  | -0.60502 | -1.04429 |
| H                             | -0.21385                                                                                                                                                                                  | -0.62658 | -1.00441 |
| C                             | -1.07726                                                                                                                                                                                  | -1.12062 | -0.54617 |
| H                             | -0.96327                                                                                                                                                                                  | -1.13438 | -0.55275 |
| C                             | -1.08502                                                                                                                                                                                  | -1.08309 | -0.50774 |
| H                             | -0.97747                                                                                                                                                                                  | -1.06748 | -0.48434 |

|   |          |          |          |
|---|----------|----------|----------|
| N | -0.81340 | -0.53389 | -0.47792 |
| C | -1.36521 | -0.79365 | -0.32275 |
| H | -1.37893 | -0.81428 | -0.35960 |
| C | -1.41195 | -0.82746 | -0.27531 |
| C | -1.44932 | -0.88973 | -0.27094 |
| C | -1.09856 | -0.61718 | -0.31386 |
| C | -0.92557 | -0.54958 | -0.39396 |
| C | -0.84370 | -0.51329 | -0.43593 |
| H | -0.80902 | -0.46580 | -0.42909 |
| C | -1.10811 | -1.09888 | -0.73532 |
| H | -1.07005 | -1.05860 | -0.75979 |
| C | -1.12237 | -1.15790 | -0.74985 |
| C | -1.06522 | -1.17294 | -0.79510 |
| C | -1.07047 | -1.23234 | -0.80283 |
| C | -1.00013 | -1.25181 | -0.84543 |
| H | -0.91842 | -1.22501 | -0.87134 |
| C | -0.99774 | -1.12847 | -0.83618 |
| C | -0.85947 | -1.05254 | -0.91851 |
| C | -0.71323 | -0.97043 | -1.14244 |
| H | -0.76108 | -0.98029 | -1.18185 |
| C | -0.77195 | -1.00603 | -1.09975 |
| H | -0.86404 | -1.04304 | -1.10637 |
| H | -0.69337 | -0.35486 | -0.57361 |
| C | -0.75786 | -0.43673 | -0.52802 |
| H | -0.84242 | -0.41754 | -0.50744 |
| C | -1.28029 | -0.91892 | -0.33727 |
| H | -1.18537 | -0.88430 | -0.32686 |
| C | -1.25657 | -0.95549 | -0.37464 |
| H | -1.14459 | -0.94916 | -0.39339 |
| C | -0.16101 | -0.47163 | -0.83101 |
| H | -0.09560 | -0.48166 | -0.79319 |
| C | -0.15687 | -0.50707 | -0.87127 |
| H | -0.08592 | -0.54389 | -0.86539 |
| N | -0.78518 | -1.01515 | -0.95820 |
| C | -0.47269 | -0.73044 | -1.14813 |
| H | -0.50419 | -0.70501 | -1.11781 |
| C | -0.37300 | -0.70232 | -1.18780 |
| C | -0.28539 | -0.64572 | -1.18469 |
| C | -0.59696 | -0.92193 | -1.13571 |
| C | -0.71979 | -0.99376 | -1.04830 |
| C | -0.78890 | -1.03148 | -1.00456 |
| H | -0.84725 | -1.07595 | -1.01440 |
| C | -0.51468 | -0.44648 | -0.70384 |
| H | -0.60086 | -0.48091 | -0.68682 |
| C | -0.44991 | -0.39298 | -0.68181 |



|   |          |          |          |
|---|----------|----------|----------|
| C | -0.46704 | -0.38239 | -0.63033 |
| C | -0.38204 | -0.33232 | -0.61047 |
| C | -0.36762 | -0.32304 | -0.55592 |
| H | -0.40760 | -0.35490 | -0.52375 |
| C | -0.56575 | -0.42364 | -0.59429 |
| C | -0.73700 | -0.49669 | -0.51725 |
| C | -0.46304 | -1.02612 | -0.67544 |
| H | -0.35204 | -1.01814 | -0.69480 |
| C | -0.48599 | -0.98995 | -0.63778 |
| H | -0.39256 | -0.95447 | -0.62797 |
| C | 0.33299  | -0.58779 | -1.11329 |
| H | 0.40292  | -0.62487 | -1.10711 |
| C | 0.33003  | -0.55263 | -1.07292 |
| H | 0.40139  | -0.56140 | -1.03607 |
| C | -0.46021 | -1.08861 | -0.91585 |
| H | -0.55808 | -1.12348 | -0.92282 |
| C | -0.39794 | -1.05408 | -0.95874 |
| H | -0.44350 | -1.06347 | -0.99852 |
| C | -0.44909 | -0.51590 | -0.41511 |
| H | -0.53352 | -0.49679 | -0.39439 |
| C | -0.36349 | -0.47980 | -0.45238 |
| H | -0.38147 | -0.43327 | -0.46025 |
| N | -0.76220 | -0.96948 | -0.54241 |
| C | 0.30426  | -0.26427 | -0.67661 |
| H | 0.27520  | -0.28870 | -0.63902 |
| C | 0.28420  | -0.29374 | -0.72347 |
| C | 0.19494  | -0.35011 | -0.72730 |
| C | -0.57796 | -1.07312 | -0.68804 |
| C | -0.62618 | -0.99875 | -0.61171 |
| C | -0.64488 | -0.96055 | -0.57146 |
| H | -0.54914 | -0.92263 | -0.56737 |
| C | 0.44385  | -0.55068 | -1.25112 |
| H | 0.46013  | -0.51580 | -1.22490 |
| C | 0.34104  | -0.60485 | -1.24401 |
| C | 0.24496  | -0.61846 | -1.20236 |
| C | 0.15484  | -0.67332 | -1.19557 |
| C | 0.05550  | -0.69007 | -1.15307 |
| H | 0.02913  | -0.66105 | -1.12508 |
| C | 0.24665  | -0.57694 | -1.16152 |
| C | 0.23759  | -0.50573 | -1.07972 |
| C | 0.27051  | -0.44954 | -0.85429 |
| H | 0.28626  | -0.47189 | -0.81470 |
| C | 0.25153  | -0.48306 | -0.89655 |
| H | 0.25271  | -0.53093 | -0.88949 |
| C | -0.64151 | -0.87671 | -0.43292 |
| H | -0.53379 | -0.86137 | -0.40951 |

|    |          |          |          |
|----|----------|----------|----------|
| C  | -0.63210 | -0.91342 | -0.47162 |
| H  | -0.51768 | -0.92738 | -0.47731 |
| C  | 0.02246  | -0.35547 | -0.65073 |
| H  | 0.02715  | -0.30731 | -0.65380 |
| C  | -0.05780 | -0.38856 | -0.61056 |
| H  | -0.10903 | -0.36613 | -0.58197 |
| C  | -0.13115 | -0.91425 | -1.17426 |
| H  | -0.18249 | -0.91717 | -1.21457 |
| C  | -0.19831 | -0.95199 | -1.13393 |
| H  | -0.30150 | -0.98396 | -1.14285 |
| N  | 0.23281  | -0.46973 | -1.03952 |
| C  | -0.46761 | -1.21149 | -0.85273 |
| H  | -0.39191 | -1.19181 | -0.88388 |
| C  | -0.50212 | -1.17625 | -0.81362 |
| C  | -0.46465 | -1.11391 | -0.81744 |
| C  | 0.27174  | -0.38796 | -0.86167 |
| C  | 0.23341  | -0.45631 | -0.94812 |
| C  | 0.22198  | -0.49247 | -0.99191 |
| H  | 0.20632  | -0.54137 | -0.98135 |
| C  | -0.85550 | -0.89942 | -0.31526 |
| H  | -0.86112 | -0.93535 | -0.34003 |
| C  | -0.81454 | -0.83821 | -0.33159 |
| C  | -0.78717 | -0.81694 | -0.38313 |
| C  | -0.74284 | -0.75702 | -0.39608 |
| C  | -0.85550 | -0.89942 | -0.31526 |
| H  | -0.86112 | -0.93535 | -0.34003 |
| C  | -0.81454 | -0.83821 | -0.33159 |
| C  | -0.78717 | -0.81694 | -0.38313 |
| C  | -0.74284 | -0.75702 | -0.39608 |
| C  | -0.71078 | -0.73219 | -0.44813 |
| H  | -0.74070 | -0.75427 | -0.48377 |
| C  | -0.78608 | -0.85853 | -0.42382 |
| C  | -0.76874 | -0.93298 | -0.50262 |
| N  | -0.15957 | -0.27933 | -0.77561 |
| N  | -0.30574 | -0.28416 | -0.63970 |
| Co | -0.25094 | -0.27866 | -0.71060 |
| N  | -1.17742 | -1.19588 | -0.70927 |
| N  | -0.34794 | -0.35857 | -0.71561 |
| C  | -1.50772 | -0.91831 | -0.22445 |
| C  | -1.42749 | -0.79605 | -0.23154 |
| H  | -1.11902 | -0.58212 | -0.22140 |
| C  | -1.19577 | -0.62351 | -0.22614 |
| C  | -1.36289 | -0.73518 | -0.23222 |
| H  | -1.52742 | -0.96665 | -0.22023 |

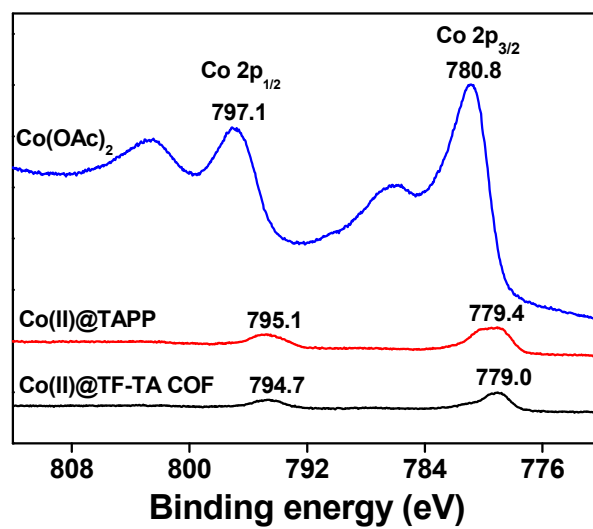

Figure S7. XPS results (Co 2p) for Co(OAc)<sub>2</sub>, Co(II)@TAPP and Co(II)@TA-TF COF.

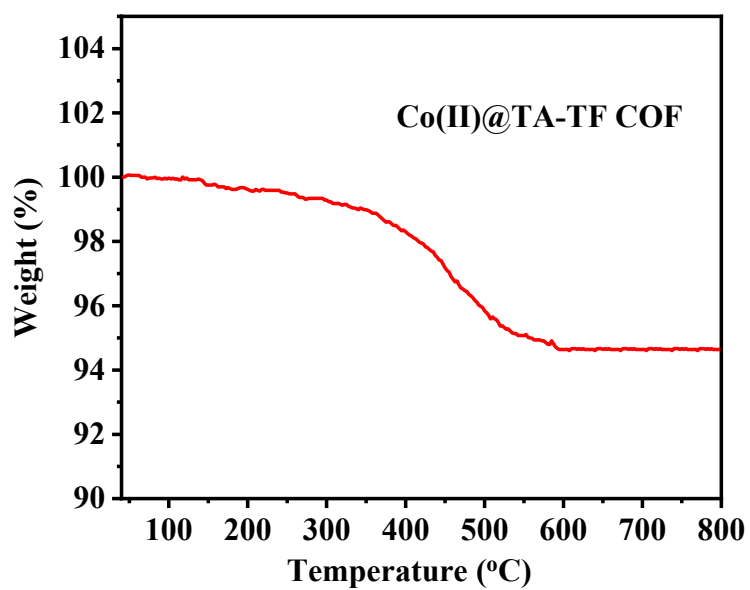

Figure S8. TGA curve of Co(II)@TA-TF COF under N<sub>2</sub>.

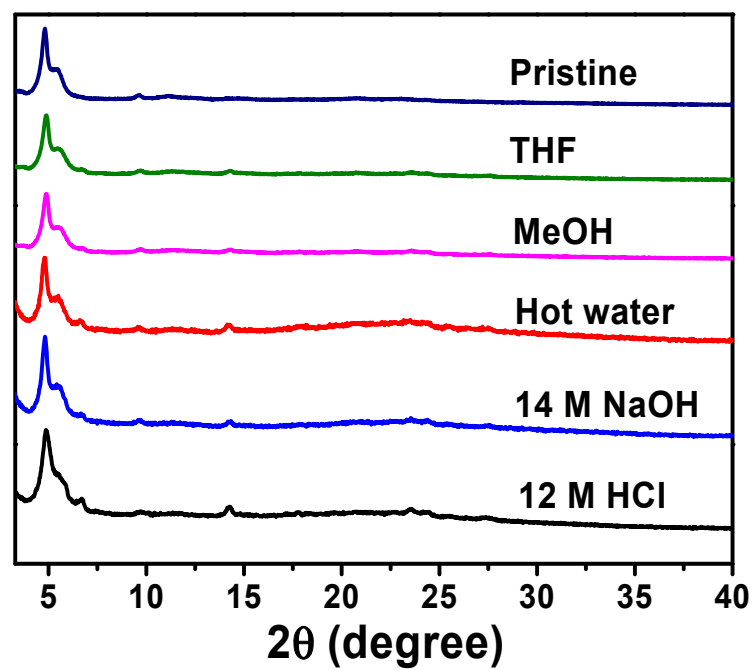

**Figure S9.** PXRD patterns of Co(II)@TA-TF COF after treatment for one week at different conditions.

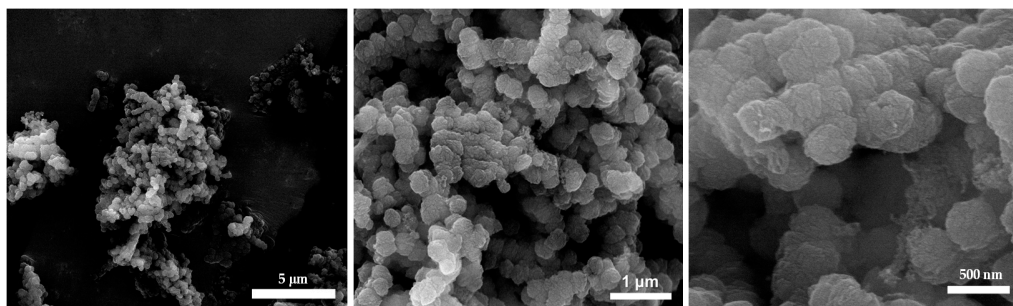

**Figure S10.** SEM images of Co(II)@TA-TF COF.

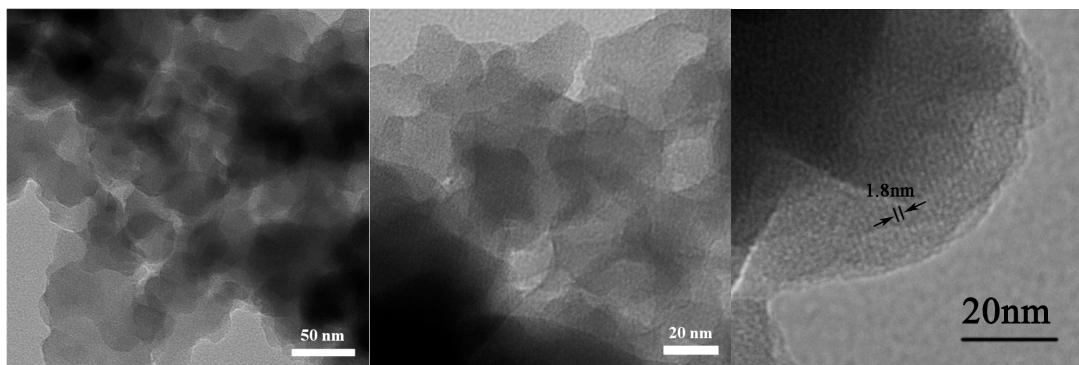

**Figure S11.** TEM images of Co(II)@TA-TF COF.

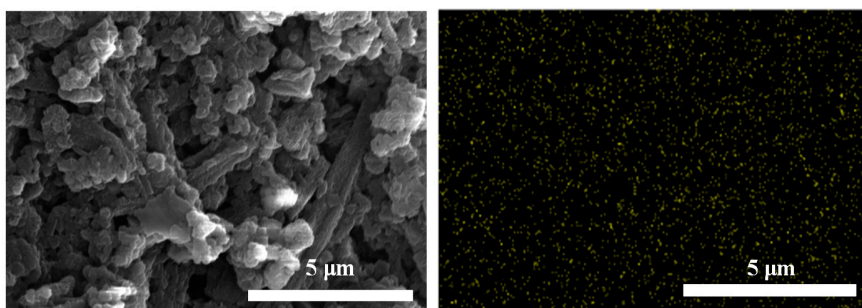

**Figure S12.** EDS mapping of Co(II)@TA-TF COF for Co distribution.

**Table S3.** Comparison of CO<sub>2</sub> uptake ability of various COFs at 298 K.

| COFs                                        | S <sub>BET</sub> (m <sup>2</sup> g <sup>-1</sup> ) | CO <sub>2</sub> uptake (wt%) | Reference |
|---------------------------------------------|----------------------------------------------------|------------------------------|-----------|
| Co(II)@TA-TF COF                            | 1076                                               | 16.9                         | herein    |
| COF-5                                       | 1670                                               | 5.9                          | S3        |
| TD COF-5                                    | 2497                                               | 9.2                          | S4        |
| COF-103                                     | 3530                                               | 7.6                          | S3        |
| IL COF-1                                    | 2723                                               | 6.0                          | S5        |
| TpPa-1                                      | 535                                                | 15.6                         | S6        |
| ACOF-1                                      | 1176                                               | 17.7                         | S7        |
| [HO <sub>2</sub> C]100%-H <sub>2</sub> PCOF | 1176                                               | 18                           | S8        |

**Table S4.** Comparison of catalytic performance of Co(II)@TA-TF COF with previously reported COFs and MOFs.

| Entry | Catalyst                            | Substrate | Pressure (MPa) | Temperature (K) | Time (h) | Solvent | Yield (%) |             | Ref       |
|-------|-------------------------------------|-----------|----------------|-----------------|----------|---------|-----------|-------------|-----------|
| 1     | Co(II)@TA-TF COF                    |           | 0.1            | 313             | 48       | free    | 92        |             | this work |
|       |                                     |           | 0.5            | 313             | 48       | free    | 99        |             | this work |
| 2     | OMe-OH-TPBP-COF                     |           | 0.1            | 313             | 24       | /       | 91        |             | S1        |
| 3     | CTF-0-400/600-20/20-5               |           | 0.69           | 403             | 4        | free    | Conv 100  | Select 92.6 | S2        |
| 4     | CCTF-350                            |           | 0.1            | 393             | 24       | /       | Conv 95   | Select 98   | S3        |
| 5     | ImIP@TT-COF                         |           | 0.1            | 393             | 10       | free    | >99       |             | S4        |
| 6     | CTF-1-HSA                           |           | 0.69           | 403             | 4        | free    | Conv 95   | Select 98   | S5        |
| 7     | COF 1/ZnBr <sub>2</sub>             |           | 0.1            | 353             | 12       | free    | Conv >99  | Select 100  | S6        |
| 8     | COF-PI-2                            |           | 0.1            | 324             | 24       | free    | 99        |             | S7        |
| 9     | Cu <sub>x</sub> O <sub>y</sub> @COF |           | 0.1            | 308-313         | 12       | free    | 98        |             | S8        |
| 10    | COF-JLU7                            |           | 0.1            | 313             | 48       | free    | 92        |             | S9        |
| 11    | AMIMBr@H <sub>2</sub> P-DHPh COF    |           | 1              | 393             | 24       | free    | 91        |             | S10       |
| 12    | PPS-COF-TpBpy-Cu                    |           | 0.1            | 313             | 24       | free    | 95        |             | S11       |
| 13    | Zn/TPA-TCIF(BD)                     |           | 0.5            | 313             | 10       | /       | Conv 98.8 | Select 99.4 | S12       |
| 14    | CTF-CSU19                           |           | 0.1            | 298             | 48       | free    | 96        |             | S13       |
| 15    | Co-PCCTF <sub>5</sub>               |           | 0.1            | 393             | 24       | free    | 94        |             | S14       |

|    |                                       |                                                                                     |      |         |    |              |               |                |           |
|----|---------------------------------------|-------------------------------------------------------------------------------------|------|---------|----|--------------|---------------|----------------|-----------|
| 16 | COF-salen-Co                          |    | 2    | 373     | 3  | /            | Conv<br>97    | Select<br>99   | S15       |
| 17 | Zn-CIF2-C <sub>2</sub> H <sub>4</sub> |    | 2.5  | 393     | 4  | /            | Conv<br>98    | Select<br>>99  | S16       |
| 18 | COF-TpPa-Py-Br <sup>-</sup>           |    | 0.1  | 373     | 18 | /            | >99           |                | S17       |
| 19 | COF-HNU3                              |    | 2    | 373     | 36 | free         | 96            |                | S18       |
| 20 | COF-IL                                |    | 0.1  | 353     | 48 | free         | 98            |                | S19       |
| 21 | ZIF-90-IL-1                           |    | 2.5  | 363     | 8  | free         | Conv<br>99.12 | Select<br>97.5 | S20       |
| 22 | POM@ImTD-COF                          |    | 0.1  | 353     | 24 | free         | Conv<br>>99   | Select<br>>99  | S21       |
| 23 | 2,5-DCP-CTF                           |  | 0.69 | 403     | 4  | free         | 95            |                | S22       |
| 24 | CTF-500                               |  | 1    | 363     | 12 | /            | 95            |                | S23       |
| 25 | NHC-CTFs                              |  | 0.5  | 373     | 6  | /            | 97            |                | S24       |
| 26 | Co(II)@TA-TF COF                      |  | 0.1  | 313     | 48 | free         | 99            |                | this work |
| 27 | OMe-OH-TPBP-COF                       |  | 0.1  | 313     | 24 | /            | 90            |                | S1        |
| 28 | ImIP@TT-COF                           |  | 0.1  | 393     | 24 | free         | 98            |                | S4        |
| 29 | CTF-P-HSA                             |  | 0.69 | 403     | 4  | free         | Conv<br>83.4  | Select<br>78   | S5        |
| 30 | Cu <sub>x</sub> O <sub>y</sub> @COF   |  | 0.1  | 308-313 | 12 | free         | 92            |                | S8        |
| 31 | IL-ZIF-90                             |  | 1    | 393     | 3  | free         | 95            |                | S25       |
| 32 | AMIMBr@H <sub>2</sub> P-DHPh<br>COF   |  | 1    | 393     | 24 | free         | 95            |                | S10       |
| 33 | COF-366-Co(1)/PTAT                    |  | 1.5  | 393     | 4  | acetonitrile | 97.5          |                | S26       |

|    |                  |     |     |    |              |               |                        |
|----|------------------|-----|-----|----|--------------|---------------|------------------------|
| 34 | PPS@COF-TpBpy-Cu | 0.1 | 298 | 72 | free         | 94            | S11                    |
| 35 | Zn/TPA-TCIF(BD)  | 0.5 | 313 | 10 | /            | Conv<br>99.3  | Select<br>99.7<br>S12  |
| 36 | CTF-CSU19        | 0.1 | 298 | 48 | free         | 99            | S13                    |
| 37 | COF-salen-Co     | 2   | 373 | 3  | /            | Conv<br>91    | Select<br>99<br>S15    |
| 38 | COF-HNU3         | 2   | 373 | 48 | free         | 99            | S18                    |
| 39 | ZIF-90-IL-1      | 2.5 | 363 | 8  | free         | Conv<br>96.27 | Select<br>98.17<br>S20 |
| 40 | TpPa-1           | 0.1 | 298 | 8  | acetonitrile | 86            | S27                    |
| 41 | ZIF-90           | 1.2 | 393 | 8  | free         | 81            | S28                    |
| 42 | CTF-500          | 1   | 363 | 12 | /            | 99            | S23                    |

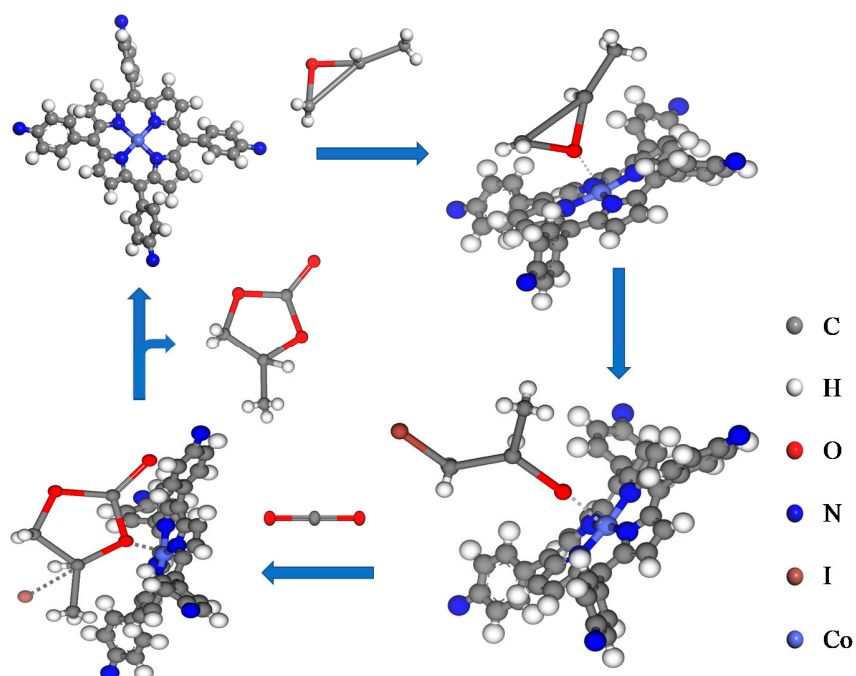

**Figure S13.** Scheme of possible catalytic mechanism for the reaction of epoxide and CO<sub>2</sub> into cyclic carbonate catalyzed by Co(II)@TA-TF COF.



Based on the previous reports, a tentative mechanism is proposed for the cycloaddition of epoxide and CO<sub>2</sub> into cyclic carbonate catalyzed by the Lewis acid-based catalyst of Co(II)@TA-TF COF. The COF gave a high catalytic activity on CO<sub>2</sub> conversion because of its exposed metal Co sites located within the centre of porphyrin units, as illustrated in Figure S13. The reaction is initiated by binding the O atom of epoxide (we take propylene oxide as an example here) with the unsaturated Co site in the COF, through which the C-O bond of epoxide is weakened. Subsequently, the I<sup>-</sup> generated from tylammonium iodine (TBAI) attacks the less-hindered carbon atom of the coordinated epoxide to open the epoxy ring. After that, CO<sub>2</sub> interacts with the oxygen anion of the opened epoxy ring to form an alkylcarbonate anion, followed by a ring closure step to give the production of cyclic carbonate.

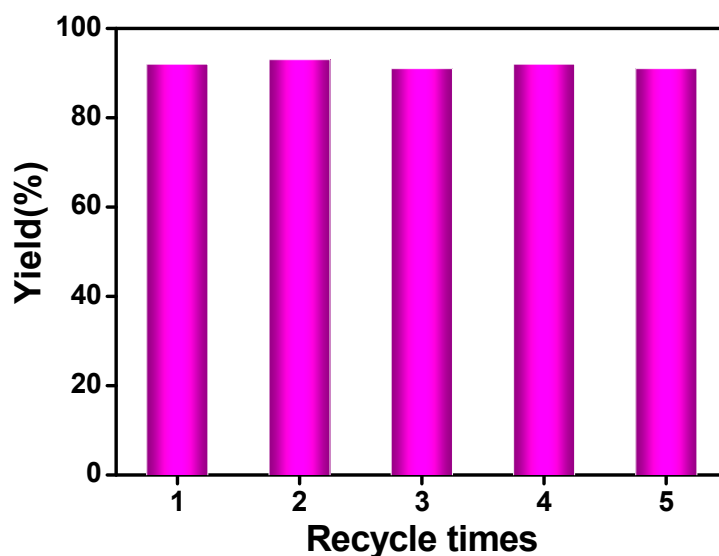

**Figure S14.** Recyclability test of the Co(II)@TA-TF COF as catalyst for the cycloaddition reaction.

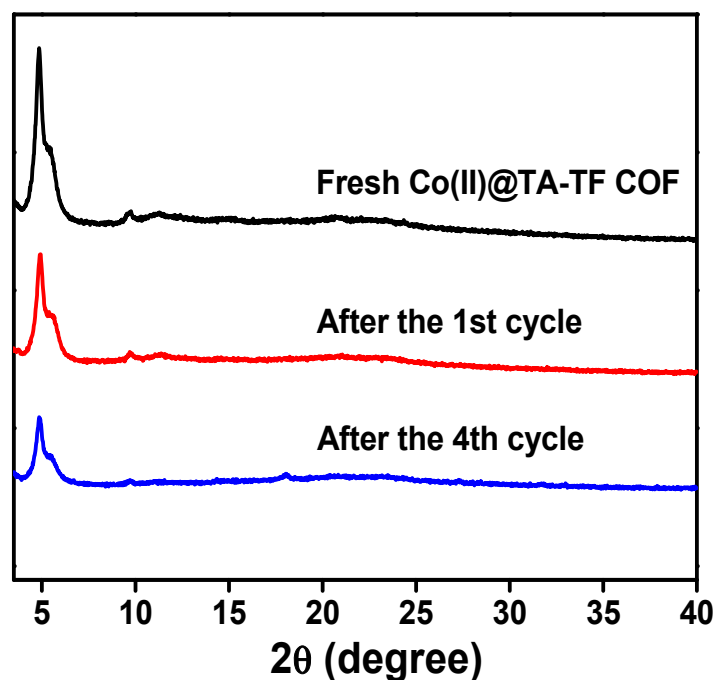

**Figure S15.** PXRD patterns of the Co(II)@TA-TF COF before and after the recycling test. Epichlorohydrin was selected as a model substrate for this reaction, and all of the other experimental parameters were identical to those presented in Table 1 in the body text.

## References

- S1. Yang, F.; Li, Y.; Zhang, T.; Zhao, Z.; Chen, L, *Chem. Eur. J.* **2020**, *26*, 4510.
- S2. Katekomol, P.; Roeser, J.; Bojdys, M.; Weber, J.; A, Thomas. *Chem. Mater.* **2013**, *25*, 1542.
- S3. Liu, T.T.; Xu, R.; Yi, J.D.; Liang, J.; Wang, X.S.; Shi, P.C. *ChemCatChem* **2018**, *10*, 2036.
- S4. Zhong, H.; Gao, J.; Sa, R.; Yang, S.; Wu, Z.; Wang, R. *ChemSusChem* **2020**, *13*, 6050-6050.
- S5. Jérme R.; Kailasam, K.; Thomas, A. *ChemSusChem* **2012**, *5*, 1793.
- S6. Dhankhar, S.S.; Nagaraja, C.M. *Micropor. Mesopor. Mater.* **2020**, *308*, 110314.
- S7. Ding, L.; Yao, B.; Wu, W.; Yu, Z.; Wang, X.; Kan, J.; Dong, Y. *Inorg. Chem.* **2021**, *60*, 12591.
- S8. Sengupta, M.; Bag, A.; Bordoloi, A.; Islam, M. *J. CO<sub>2</sub> Util.* **2019**, *34*, 533.
- S9. Zhi, Y.; Shao, P. Feng, X.; Xia, H.; Zhang, Y.; Shi, Z.; Mu, Y.; Liu, X. *J. Mater. Chem. A* **2018**, *6*, 374.
- S10. Zhang, Y.; Hu, H.; Ju, J.; Yan, Q.; Arumugam, V.; J, X.; Cai, H.; Gao, Y. *Chin. J. Catal.* **2020**, *41*, 485.

- S11. Sun, Q.; Aguila, B.; Perman, J.; Nguyen, N.; Ma, S. *J. Am. Chem. Soc.* **2016**, *138*, 15790.
- S12. Puthiaraj, P.; Kim, H.S.; Yu, K.; Ahn, W.S. *Micropor. Mesopor. Mater.* **2020**, *297*, 110011.
- S13. Yu, W.; Gu, S.; Fu, Y.; Xiong, S.; Pan, C.; Liu, Y.; Yu, G. *J. Catal.* **2018**, *362*, 1.
- S14. Wu, Q.J.; Mao, M.J.; Chen, J.X.; Huang, Y.B.; Cao, R. *Catal. Sci. Technol.* **2020**, *10*, 8026.
- S15. Li, H.; Feng, X.; Shao, P.; Chen, J.; Li, C.; Jayakumar, S.; Yang, Q. *J. Mater. Chem. A* **2019**, *7*, 5482.
- S16. Liu, J.; Zhao, G.; Cheung, O.; Jia, L.; Sun, Z.; Zhang, S. *Chem. Eur. J.* **2019**, *25*, 9052.
- S17. He, H.; Zhu, Q.Q.; Zhang, W.W.; Zhang, H.W.; Chen, J.; Li, C.P.; Du, M. *ChemCatChem* **2020**, *12*, 5192.
- S18. Qiu, J.; Zhao, Y.; Li, Z.; Wang, H.; Shi, Y.; Wang, J. *ChemSusChem* **2019**, *12*, 2421.
- S19. Ding, L.G.; Yao, B.J.; Fei, L.; Shi, S.C.; Dong, Y.B. *J. Mater. Chem. A* **2019**, *7*, 4689.
- S20. Yuan, H.; Wu, Y.; Pan, X.; Gao, L.; Xiao, G. *Catal. Lett.* **2020**, *150*, 3561.
- S21. Zhang Y.; Yang, D.H.; Qiao, S.; Han, B.H. *Langmuir* **2021**, *37*, 10330.
- S22. Li, Y.M.; Yang, L.; Sun, L.; Ma, L.; Li, Z. *J. Mater. Chem. A* **2019**, *7*, 26071.
- S23. Buyukcakir, O.; Sang, H.J.; Talapaneni, S.N.; Kim, D.; Coskun, A. *ACS Appl. Mater. Interfaces* **2017**, *9*, 7209.
- S24. Yue, C.; Wang, W.; Li, F. *ChemSusChem* **2020**, *13*, 5996.
- S25. Tharun, J.; Bhin, K.M.; Roshan, R.; Kim, D.W.; Kathalikkattil, A.C.; Babu, R.; Ahn, H.Y.; Wonc, Y.S.; Park, D.W. *Green Chem.* **2016**, *18*, 2479.
- S26. Xu, K.; Dai, Y.; Ye, B.; Wang, H. *Dalton Trans.* **2017**, *46*, 10780.
- S27. Das, A.; Mondal, R.K.; Chakraborty, P.; Riyajuddin, S.; Chowdhury, A.H.; Ghosh, S.; Khan, A.; Ghosh, K.; Islam, S.M. *Mol. Catal.* **2021**, *499*, 111253.
- S28. Tharun, J.; Mathai, G.; Kathalikkattil, A.C.; Roshan, R.; Won, Y.S.; Cho, S.J.; Chang, J.S.; Park, D.W. *ChemPlusChem* **2015**, *80*, 715.
